# Supplementary material for: Photocatalytic degradation of Dyes in Water by Analytical Reagent Grade Photocatalysts – A comparative study
Source: Copernicus journal article supplement (doi:10.5194/dwes-2017-20), 2017-06-02
Supplement: Supplementary file [file dwesrevisedpaper.pdf › dwespdffiles/dwesrevisedpaper.pdf]

# Photocatalytic degradation of dyes in water by analytical reagent grade ZnO, TiO<sub>2</sub> and SnO<sub>2</sub>: A comparative study

Dnyaneshwar R. Shinde, Popat S. Tambade\*, Manohar G. Chaskar, Kisan M. Gadave

Prof. Ramkrishna More Arts, Commerce and Science College, Akurdi, Pune-44,

5 Affiliated Savitribai Phule Pune University (India)

*Correspondence:* Popat S. Tambade (pstam3@rediffmail.com)

**Abstract.** In this study, we evaluated the photocatalytic activities of analytical reagent (AR) grade ZnO, TiO<sub>2</sub>, and SnO<sub>2</sub> to identify a low-cost photocatalyst for dye degradation. The obtained samples of ZnO, TiO<sub>2</sub> and SnO<sub>2</sub> were characterized by XRD, scanning electron microscope imaging, UV-VIS diffuse reflectance spectroscopy. The decolourization of three  
10 structurally diverse dyes, namely crystal violet, basic blue, and methyl red under solar irradiation was used to evaluate the photocatalytic activities of three metal oxides. The photocatalytic activities of as received three metal oxides were tested with the photocatalytic degradation of dyes and compared with Degussa P-25. Dye solutions with each metal oxide at initial pH 9 were subjected to irradiation under sunlight and monitored for up to the stage of complete decolourization. The results indicate that ZnO exhibited the highest photocatalytic activity as compared to TiO<sub>2</sub> and SnO<sub>2</sub> as well as that of Degussa P-25 (TiO<sub>2</sub>).  
15 The photocatalytic dye decolourization rates with ZnO were 1.14–1.35, 1.70–3.1, and 4–8.5 times higher than those of the Degussa P-25, TiO<sub>2</sub>, and SnO<sub>2</sub>, respectively. The percentage COD removal was studied for ZnO and partial removal was observed at the decolourization stage. To enhance photocatalytic activity of AR grade ZnO it was loaded with Ag metal and about 20% enhancement in the activity was observed.

**Keywords:** photocatalysis, dyes, decolourization, solar irradiation, metal oxide

## 20 1 Introduction

Dyes and pigments are extensively used in industries that manufacture and process textiles, paper, plastics, leather, food, and cosmetic products. The release of dye-containing effluents from these industries into water bodies possess a considerable threat to aquatic life as well as the environment. Numerous studies have investigated the efficient removal of hazardous organic molecules from waste water during past decades. These studies have demonstrated that the hazardous organic molecules in  
25 waste water can be degraded using photo excited charge carriers in an excited semiconductor (Yang et al., 2001; Qi et al., 2014; Singh et al., 2015; Wang et al., 2016; Keane et al., 2014; Shinde et al., 2015). This process is termed photocatalysis. The most suitable natural energy source for semiconductor-based photocatalysis is solar irradiation (Nguyen et al. 2015). However, solar irradiation can be optimally used for photocatalysis only by designing an efficient solar-irradiation-driven photocatalytic system. Recently, many semiconductors, such as SnO<sub>2</sub>, WO<sub>3</sub>, TiO<sub>2</sub>, CeO<sub>2</sub>, and ZnO, have been used in heterogeneous  
30 photocatalysis (Xu et al., 2013; Herrmann, 1999). Most of these semiconductors are wide-band-gap semiconductors, which

require ultraviolet (UV) irradiation for photocatalysis (Lin and Lin, 2007; Abo et al., 2016). When a wide-band-gap photocatalyst is irradiated with light of energy equal to or higher than its band-gap energy, electron-hole pairs are created. In an aqueous medium, reactants may be adsorbed on the surface of a photocatalyst and may react directly or indirectly with the photo generated electrons and holes (Girish Kumar and Koteswara Rao, 2015; Nagaraja et al., 2012). Photocatalysis was reported to enable efficient degradation of a wide range of organic pollutants and hazardous inorganic materials into readily biodegradable compounds, and eventually mineralize them into relatively harmless CO<sub>2</sub> and water (Chong et al., 2010). In the category of semiconductor photocatalysts TiO<sub>2</sub> and ZnO have been widely investigated (Pardeshi and Patil, 2008; Parida and Parija, 2006). TiO<sub>2</sub> is generally considered to be a non-toxic, chemically inert, and photo stable catalyst, and it has the ability to degrade dyes as well as several organic pollutants (Hu et al., 2013; Zhou et al., 2011; Akpan and Hameed, 2009). The Degussa P-25 photocatalyst (Mixture of anatase and rutile TiO<sub>2</sub>) exhibited significantly higher photocatalytic activity in organic dye degradation than do other commercially used forms of TiO<sub>2</sub> (Lydakis-Simantiris et al., 2010; Zhou et al., 2012; Hou et al., 2015). The extensive use of TiO<sub>2</sub> for large-scale water treatment is uneconomical; therefore, studies to identify suitable alternatives to TiO<sub>2</sub> have been conducted worldwide. ZnO has been widely studied as a photocatalyst in water treatment because of its low cost and favourable optoelectronic and catalytic properties (Nagaraja et al., 2012). ZnO is an n-type semiconductor with many attractive features. It has a wide band gap of 3.2 eV and a large number of active sites. ZnO is an efficient visible-light photocatalyst and generates large quantities of hydroxyl radicals. Surface and core defects, such as oxygen vacancies, zinc interstitials, and oxygen interstitials, in ZnO play a vital role in the photocatalytic reactions by providing active sites for preventing electron-hole recombination (Hans et al., 2012; Janotti and Van de Walle, 2009). This, in turn, enhances the generation of hydrogen peroxide (H<sub>2</sub>O<sub>2</sub>), superoxide (O<sub>2</sub><sup>-</sup>) radicals, and hydroxyl (OH<sup>\*</sup>) radicals, which have been reported to be responsible for the photocatalytic activity (Girish Kumar and Koteswara Rao, 2015), on the ZnO surface. Doping ZnO nanoparticles with metals and transition metals such as Ag, Pb, Mn, and Co can increase the photocatalytic activity because doping increases surface defects (Patil et al., 2010; Sood et al., 2014; Zhi-gang et al., 2012).

We systematically studied the photocatalytic activity of commercially available analytical reagent (AR) grade ZnO, TiO<sub>2</sub>, and SnO<sub>2</sub> powders during the degradation of industrial dyes, namely crystal violet (CV), basic blue (BB), and methyl red (MR) in aqueous solutions under solar irradiation. Furthermore, the activities of these photocatalysts were compared with that of the Degussa P-25 photocatalyst. Dye degradation studies were performed in a specially designed reactor called the flat slurry reactor (FSR). We expect that this work will provide crucial theoretical insights and will have practical applications in the treatment of polluted water that results from the widespread disposal of organic pollutants.

## 2 Experimental methods

### 2.1 Materials

The Degussa P-25 photocatalyst was obtained from Nanoshel (US) (characteristic information: in Support file Table-1) and used as a benchmark photocatalyst. Commercially available AR grade TiO<sub>2</sub>, ZnO<sub>2</sub>, and SnO<sub>2</sub> were purchased from Loba Chemie Ltd. (India). Three structurally diverse dyes, namely crystal violet (CV), methyl red (MR), and basic blue (BB), used

in this investigation were purchased from Sigma–Aldrich (India) (Support file Table-2). All the materials were used without further purification. Tap water was used for preparation of dye solutions, and the pH of the solutions was adjusted using 1 M NaOH or 1 M H<sub>2</sub>SO<sub>4</sub>.

## 2.2 Characterization of photocatalysts

5 The powder X-ray diffractogram (XRD) of the as-received ZnO, TiO<sub>2</sub>, and SnO<sub>2</sub> samples were recorded and analysed to determine their crystal structure and lattice parameters. The average particle size of each metal oxide was estimated using the Debye–Scherrer formula. The band gaps were evaluated from diffuse reflectance spectra (DRS) of metal oxides in absorbance mode. Particle morphology was analysed through scanning electron microscopic (SEM) imaging. Specific surface areas were calculated using a prescribed method (Jiji et al., 2006; Jo-Yong et al., 2006).

## 10 2.3 Photoreactor and degradation experiment

Photocatalytic experiments were carried out in a specially designed FSR. The reactor consisted of rectangular reaction vessel of size 20 × 30 × 4 cm<sup>3</sup>. The reaction vessel was connected to a stirring tank (volume 300 mL) through polyethylene pipes of 10 mm diameter (Fig.1). The reaction mixture was collected from the reaction vessel into a stirring tank, stirred, and pumped back into the reaction vessel. The reaction mixture was stirred and circulated continuously to maintain the catalyst in the form of a suspension. The experiments were performed using solar irradiation incident between 10 A.M.and 3 P.M., where the intensity of the irradiation was 57000–66000 lx.

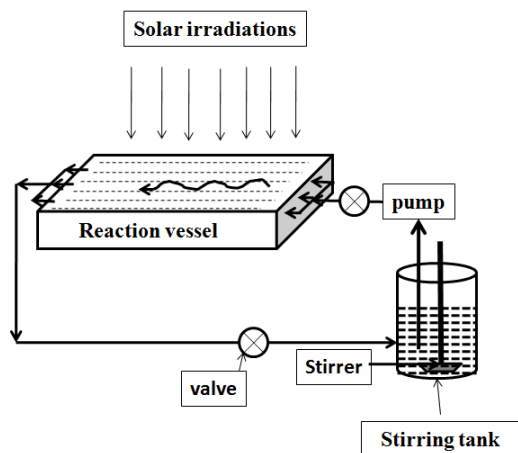

**Figure 1: Reactor set-up for photodegradation of dye under solar irradiation**

The reaction conditions such as pH, catalyst dose, stirring rate, circulation rate of reaction mixture were optimized in preliminary experiments and reaction was performed under optimized experimental conditions. Except pH and temperature all other parameters remained constant during experiment. pH of dye solution was decreased from 9±0.1 to 8.6±1 while temperature raised from room temperature to 39±3°C. Each dye solution (10 mg L<sup>-1</sup>) was prepared using tap water. To 2000 mL of dye solution, 400 mg L<sup>-1</sup> photocatalyst was added and a suspension was developed by stirring. The suspension was placed in dark for 1 h to achieve the adsorption–desorption equilibrium before exposure to solar irradiation. Then 1.2 L suspension was transferred to the reactor and exposed to solar irradiation. The same procedure was used for all the catalysts

used in the study. The photocatalytic activity of each metal oxide was determined under optimised conditions of pH of the dye solution (pH=9). At predetermined time intervals, 10 mL of each reaction mixture was withdrawn and centrifuged, and the absorbance of supernatant was determined at  $\lambda_{\max}$  of the dye at specified pH. The rate constant of decolourization reaction was determined using the Langmuir–Hinshelwood equation (Chong et al., 2009):

$$k_{obs} = \frac{2.303}{t} \log_{10} \left( \frac{A_0}{A} \right) \quad (1)$$

where,  $k_{obs}$  is the apparent reaction rate constant,  $A_0$  is the initial absorbance of the dye solution, and  $A$  is the absorbance of dye solution after irradiation at time  $t$ .

Finally we have determined decrease in chemical oxygen demand (COD) of treated dye solution according to previously described method (Pawar et al., 2016).

## 2.5 Loading Ag metal on AR grade ZnO

Five grams of AR grade ZnO was sonicated for 5 minutes in 100 mL 0.01M  $\text{AgNO}_3$  solution, stirred for 30 minutes and centrifuged to recover ZnO. The recovered ZnO was suspended in an alkaline (using ammonia) glucose solution (0.1M, 100 mL, pH=9) and was boiled for 5 min. The ZnO was recovered through centrifugation; it was washed with distilled water until it was free from alkali. Finally, it was annealed for 30 min in a furnace at  $450^\circ\text{C}$ .

## 3 Results and discussion

### 3.1 Characterisation of catalysts

Powder XRD analyses were conducted on the as-received AR grade ZnO,  $\text{TiO}_2$ , and  $\text{SnO}_2$  to investigate their crystalline phases, lattice parameters, and average crystallite sizes. Fig. 2 represents the XRDs of the three as-received semiconductor samples.

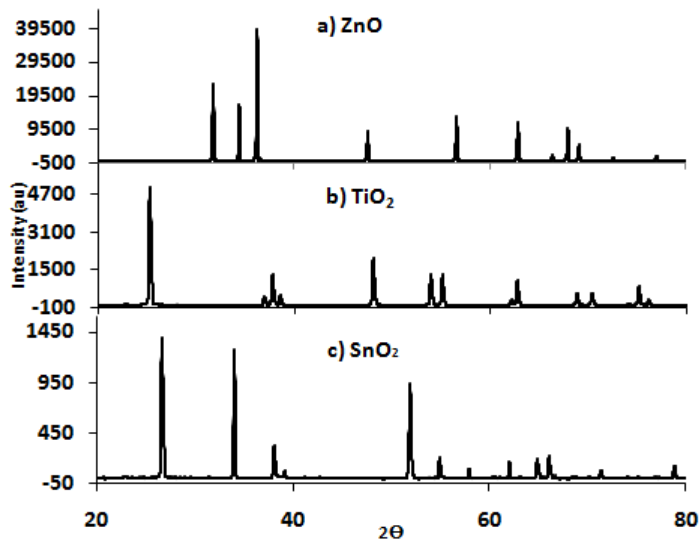

Figure 2: XRDs of a) ZnO, b)  $\text{TiO}_2$ , and c)  $\text{SnO}_2$

Fig. 2(a) depicts the XRD patterns of ZnO. The major diffraction peaks are observed for ZnO at  $2\theta$  angles  $31.78^\circ$ ,  $34.44^\circ$ ,  $36.27^\circ$ ,  $47.55^\circ$ ,  $56.61^\circ$ ,  $62.87^\circ$ ,  $66.39^\circ$ ,  $67.96^\circ$ , and  $69.10^\circ$ , which are indexed to the planes [100], [002], [101], [102], [110], [103], [200], [112], and [201], respectively. These peaks match the hexagonal cubic (wurtzite) structure of ZnO (JCPDS 36-1451) (Pawar et al., 2016). In Fig. 2(b), separate and sharp diffraction peaks of  $\text{TiO}_2$  are observed at  $25.3^\circ$ ,  $37.79^\circ$ ,  $48.04^\circ$ ,  $53.9^\circ$ ,  $55.07^\circ$ ,  $62.7^\circ$ ,  $68.78^\circ$ ,  $70.30^\circ$ , and  $75.08^\circ$ , corresponding to planes, [101], [004], [200], [105], [211], [213], [116], [220], and [215] respectively, of the pure anatase (tetragonal) phase of  $\text{TiO}_2$  (JCPDS 21-1272). Fig. 2(c) depicts the diffraction peaks of  $\text{SnO}_2$  at  $26.66^\circ$ ,  $34.03^\circ$ ,  $38.07^\circ$ ,  $39.15^\circ$ ,  $42.67^\circ$ ,  $51.93^\circ$ ,  $54.94^\circ$ ,  $57.96^\circ$ ,  $62.04^\circ$ ,  $64.88^\circ$ ,  $66.07^\circ$ ,  $71.34^\circ$ , and  $78.81^\circ$  which can be indexed to the planes [100], 10 [101], [200], [111], [220], [211], [220], [002], [310], [112], [301], [202], and [321], respectively, of the rutile (cassiterite) crystalline phase of  $\text{SnO}_2$  (JCPDS 77-0451) (Zhang et al., 2009, Elsayed et al., 2014).

Lattice parameters were calculated for all three metal oxides by using XRD data and are listed in Table 1. The lattice parameters were consistent with reported values (Pawar et al., 2016; Cheng et al., 2011; Li et al., 2014; Li et al., 2013). Crystallite sizes were calculated using the intense peaks in XRD by the Debye–Scherrer formula; they were 103 nm, 36 nm and 66 nm for ZnO,  $\text{TiO}_2$ , and  $\text{SnO}_2$ , respectively.

**Table 1. Unit cell parameters calculated from XRD data**

| Parameters                                          | ZnO   | $\text{TiO}_2$ | $\text{SnO}_2$ |
|-----------------------------------------------------|-------|----------------|----------------|
| a (Å)                                               | 3.248 | 3.784          | 4.734          |
| c (Å)                                               | 5.203 | 9.514          | 3.179          |
| c/a ratio                                           | 1.602 | 2.514          | 0.672          |
| Unit cell volume ( $\times 10^{-23} \text{ cm}^3$ ) | 4.756 | 13.62          | 7.125          |
| X-ray Density ( $\text{g cm}^{-3}$ )                | 5.681 | 3.894          | 7.023          |

### 3.2 SEM micrographs of catalysts

Fig. 3 presents typical SEM micrographs of the as-received catalysts. The SEM micrographs of metal oxides reveal the agglomeration of primary particles (crystallites) to form grains of larger size. Fewer ZnO crystallites were agglomerated into cubic grains many into elongated hexagonal rods of various diameters.  $\text{TiO}_2$  grains are roughly spherical with various diameters (range 55–170 nm).  $\text{SnO}_2$  exhibits roughly spherical or irregular-shaped particles of sizes in the range 86–230 nm. The particles of all three oxides are small and have smooth surfaces.

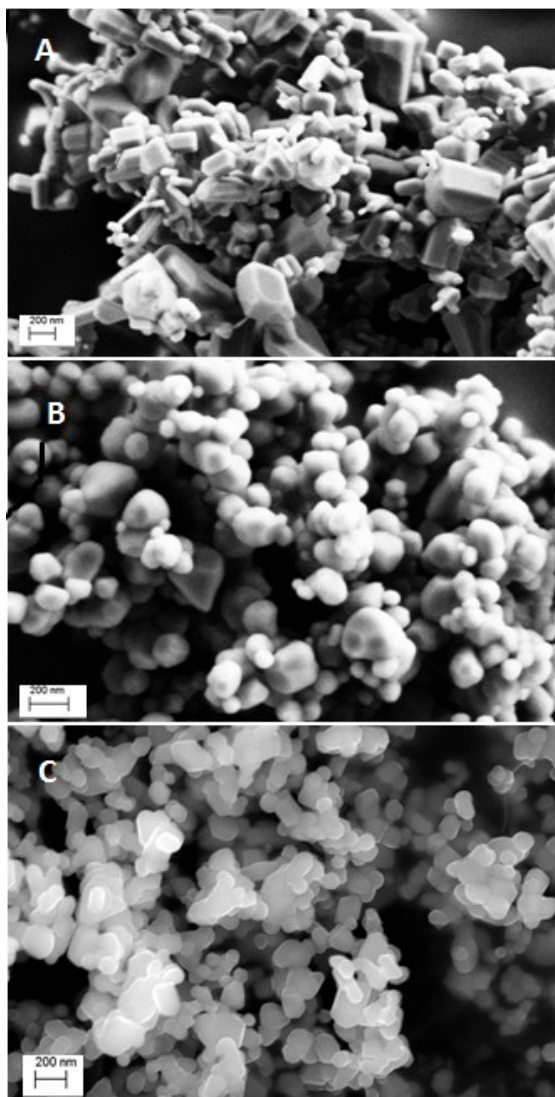

**Figure 3: SEM micrographs of ZnO (A),TiO<sub>2</sub>(B), and SnO<sub>2</sub>(C)**

### **3.3 Band gaps of ZnO, TiO<sub>2</sub> and ZnO**

- 5 The corresponding DRS in the absorbance mode of the as received oxides namely, ZnO, TiO<sub>2</sub>, and SnO<sub>2</sub> are provided in Fig. 4. These spectra indicate strong absorbance in the UV region and an absorption edge between 300 and 400 nm because of the relatively large excitation binding energy. The absorbance onsets of wurtzite ZnO, anatase TiO<sub>2</sub>, and rutile SnO<sub>2</sub> are 384, 387, and 341 nm, respectively.

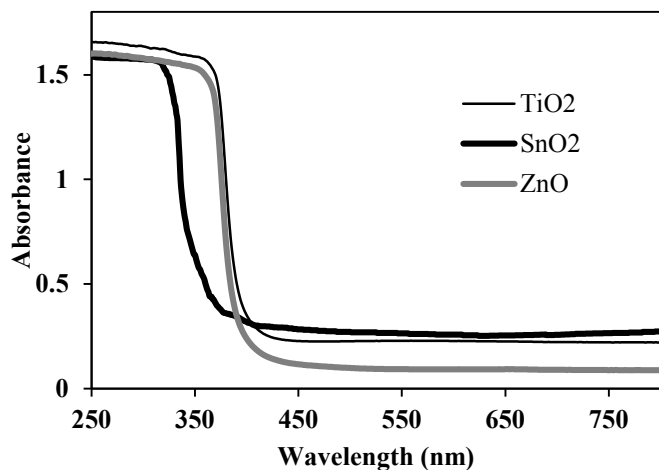

**Figure 4: diffuse absorbance spectra of ZnO, TiO<sub>2</sub>, and SnO<sub>2</sub>**

The experimentally evaluated band gaps of ZnO, TiO<sub>2</sub>, and SnO<sub>2</sub> are 3.23, 3.20, and 3.64 eV, respectively (Support file Fig.1). The observed band gaps are strongly correlated with reported values (Cheng et al., 2013; Anand et al., 2008; Gupta and Tripathi, 2011). The band gap order of these three oxides is TiO<sub>2</sub>~ZnO < SnO<sub>2</sub>.

### 3.4 Specific surface area of catalysts

The specific surface areas of AR grade ZnO, TiO<sub>2</sub>, and SnO<sub>2</sub> powders were determined using a prescribed method. Among the three oxides, TiO<sub>2</sub> exhibited the highest specific surface area (42.54 m<sup>2</sup>g<sup>-1</sup>) because of its relatively small particle size and low crystal density. ZnO and SnO<sub>2</sub> have comparable specific surface areas, 10.18 and 12.91 m<sup>2</sup>g<sup>-1</sup>, respectively, which are approximately four times less than that of TiO<sub>2</sub>. Such differences can be attributed to large crystallite sizes and high crystal densities of ZnO and SnO<sub>2</sub> compared with those of TiO<sub>2</sub>. The specific surface area of the Degussa P-25 catalyst is approximately 50 m<sup>2</sup>g<sup>-1</sup>.

### 3.5 Photocatalytic activity

To compare the photocatalytic activity of commercially available AR grade metal oxides, namely ZnO, TiO<sub>2</sub>, and SnO<sub>2</sub>, and P-25, a set of photocatalytic experiments were performed under similar conditions using the dyes CV, BB, and MR. In present study we have utilized FSR, since it has suitable design for external source of irradiation like sunlight and easy to operate. In preliminary experiments we have optimized process parameters affecting the rate of degradation of dyes. The parameters studied were initial pH of dye solution, catalyst dose, depth of dye solution in the reactor and the circulation rate. pH variation was performed over limited range (5 to 9) as a very high or low pH is not desirable in water treatment. Depending on the results of these experiments we have selected process parameters in this study. The selected parameters were pH = 9, catalyst dose = 400 mgL<sup>-1</sup>, depth of solution in reactor = 1.5 cm, and circulation rate = 130 ml min<sup>-1</sup>. Control experiments were performed on the dye solutions for three hours (i) under solar irradiation without catalyst and (ii) in dark with addition of catalyst. When dye solutions were irradiated with the light without catalyst loading, negligible decolourization (less than 2%)

was observed. When the experiments were performed with catalyst loadings in dark, 5-16% decolourization was observed for CV and BB which could be attributed to the adsorption of these dyes on the catalyst surface (Table-2).

**Table 2. Percent decolourization (adsorption) of three dyes on photocatalysts in dark**

| Photocatalyst    | Percent decolourization |          |            |
|------------------|-------------------------|----------|------------|
|                  | CV                      | BB       | MR         |
| ZnO              | 9.8±1.2                 | 16.3±0.8 | negligible |
| TiO <sub>2</sub> | 5.3±0.7                 | 8.4±1.1  | negligible |
| SnO <sub>2</sub> | 4.6±0.8                 | 7.4±0.4  | negligible |
| Degussa          | 6.9±0.6                 | 7.4±0.6  | negligible |

- 10 The photocatalytic activities were compared in terms of the rate constant of decolourization of dyes, which were obtained using the graphical method (graph of  $\log_{10}(A_0/A_t)$  against time; Support File Fig.2) on photocatalysts and are listed in Table 3.

**Table 3. Comparison of photocatalytic activities in terms of reaction rate constants for three dyes**

| Photo-catalyst         | CV                        |                           | BB                        |                           | MR                        |                           |
|------------------------|---------------------------|---------------------------|---------------------------|---------------------------|---------------------------|---------------------------|
|                        | k<br>(min <sup>-1</sup> ) | t <sub>1/2</sub><br>(min) | k<br>(min <sup>-1</sup> ) | t <sub>1/2</sub><br>(min) | k<br>(min <sup>-1</sup> ) | t <sub>1/2</sub><br>(min) |
| <b>ZnO</b>             | 0.079                     | 8.8                       | 0.10                      | 6.9                       | 0.014                     | 49.6                      |
| <b>TiO<sub>2</sub></b> | 0.026                     | 26.9                      | 0.045                     | 15.5                      | 0.008                     | 84.1                      |
| <b>SnO<sub>2</sub></b> | 0.010                     | 71.0                      | 0.017                     | 40.7                      | 0.004                     | 196.7                     |
| <b>P 25</b>            | 0.060                     | 11.6                      | 0.076                     | 9.1                       | 0.012                     | 56.4                      |

- The results indicate that for all three dyes, ZnO exhibited higher photocatalytic activity than did TiO<sub>2</sub>, SnO<sub>2</sub>, and P-25.
- 15 Comparative studies on ZnO and TiO<sub>2</sub> (the Degussa P-25 TiO<sub>2</sub>) photocatalysts have been performed by many other researchers, where synthetic ZnO has shown a higher performance than TiO<sub>2</sub> (Hussein and Abass, 2010; Sakthivel et al., 2003; Qamar and Muneer, 2009). Han et al. (2012) accounted for enhanced photocatalytic activity of ZnO in terms of higher absorbance of radiations by ZnO than by TiO<sub>2</sub> in the UV region. The surface area of a photocatalyst is one of the key parameters that affects photocatalytic activity. Among the four catalysts used in the study, ZnO displayed the lowest specific surface area while the
- 20 Degussa P-25 photocatalyst had the highest specific surface area. The results revealed that despite having a low specific surface area, ZnO exhibited a higher photocatalytic activity than did TiO<sub>2</sub> and SnO<sub>2</sub>. This might be because of differences in the intrinsic characteristics of ZnO, TiO<sub>2</sub>, and SnO<sub>2</sub>. Quantum efficiency may be used to explain the differences in photocatalytic activity; ZnO has a greater quantum efficiency than do TiO<sub>2</sub> and SnO<sub>2</sub> (Kansal et al., 2007). Another critical factor affecting the photocatalytic activity is the band gap. In our study, SnO<sub>2</sub> exhibited a relatively low activity because of its wide band gap
- 25 (3.64 eV). Since wide band gap photocatalyst needs a large amount of UV radiation to excite electron and to form electron-

hole pairs in the catalyst (Sakthivel et al., 2003; Abo et al., 2016). ZnO and TiO<sub>2</sub> exhibited comparable band gaps (3.24 and 3.20 eV, respectively). The Degussa P-25 photocatalyst has the lowest band gap (3.00 eV) and was expected to exhibit a higher photocatalytic activity than ZnO. However, the experimental results clearly indicate that ZnO had a higher photocatalytic activity than did the Degussa P-25 photocatalyst and TiO<sub>2</sub>. Solar irradiation consists of 5–7% in the ultraviolet radiations. The results of the photocatalytic activities provide in direct evidence that ZnO may be able to absorb larger fractions of photon energy more efficiently than P-25 and TiO<sub>2</sub> within the UV region (Pardeshi and Patil, 2008). This behaviour may be attributed to the intrinsic defects in ZnO crystals. The predominant defects in the ZnO are positively charged Zn interstitials and oxygen vacancies. When electron–hole pairs are formed, the Zn interstitials and oxygen vacancies facilitate redox reactions by trapping photogenerated electrons. This reduces the recombination of electrons and holes, and they are available for dye degradation (Hans et al., 2012). The Degussa P-25 photocatalyst is a blend of rutile (30%) and anatase (70%) TiO<sub>2</sub>, which prevents the recombination of electrons and holes; therefore, it shows more photocatalytic activity than does anatase TiO<sub>2</sub>.

Dye degradation by photocatalyst under solar irradiation takes place through two different mechanisms. In the first mechanism, when the photocatalyst is illuminated, a photon of energy higher than or equal to the band gap, causes excitation of electrons into the conduction band (CB) of photocatalyst. Simultaneously, an equal number of holes are generated in the valence band (VB). The high oxidative potential of the hole in the CB of catalyst permits the direct oxidation of the dye to reactive intermediates followed by degradation. The process is expressed as (Konstantinou, and Albanis, 2004):

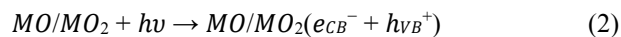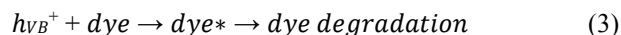

The degeneration of dyes also occurs due to their reaction with hydroxyl (OH<sup>•</sup>) and superoxide (O<sub>2</sub><sup>•-</sup>) free radicals. OH<sup>•</sup> is a highly reactive, strong oxidising chemical species, which is either formed through decomposition of water or by the reaction of a hole with surface-bound hydroxyl groups (OH<sup>-</sup>):

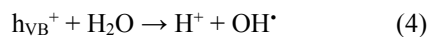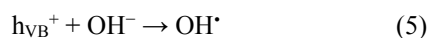

The conduction band (e<sub>CB</sub><sup>-</sup>) potential was sufficient negative to reduce O<sub>2</sub> which is adsorbed on the surface of catalyst to generate O<sub>2</sub><sup>•-</sup>

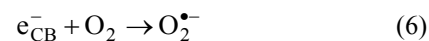

The subsequent reactions of OH<sup>-</sup> and O<sub>2</sub><sup>•-</sup> can also generate OH<sup>•</sup>. The reactions of OH<sup>•</sup> and O<sub>2</sub><sup>•-</sup> with dye molecules degrade them into simple molecules (Chen and Ray, 2001). The second mechanism is a dye sensitization mechanism. In this mechanism, the dye molecules adsorbed on the surface of catalyst absorb visible radiations and undergo electronic excitation from the highest occupied molecular orbitals to the lowest unoccupied molecular orbitals (LUMO). Then excited electrons from the LUMO of the dye molecule are injected into the conduction band (CB) of the photocatalyst and the dye is converted into cationic dye radical (Lakshmi Prasanna and Rajagopalan, 2016). This dye radical undergoes degradation to produce

mineralised products (Li et al., 2002; Muthirulan et al., 2013). The electron in the CB of the metal oxide is further scavenged by oxygen to produce  $O_2^{\bullet-}$  and results in the decolourisation of dyes. This mechanism is prominent when dye molecules are in adsorbed state on the catalyst surface. These two mechanisms are depicted in Fig. 5.

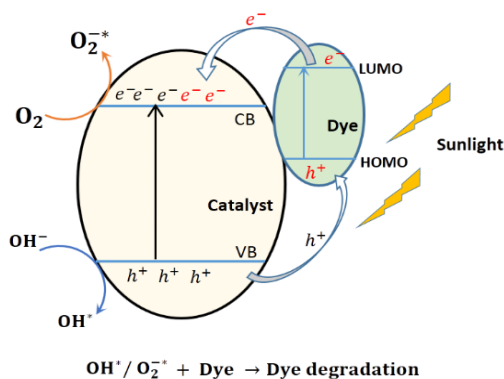

5 **Figure 5: Schematics of photodegradation of dye in solar irradiation**

The adsorption study of dyes in solution by photocatalyst showed that CV and BB were adsorbed to certain extent on all four photocatalyst while MR was adsorbed to negligible extent (Table 2).

10 The quantity of adsorption clearly reflected in terms of the decolourization rate constants of these dyes. When rate constants (Table 3) are compared with percentage adsorption (Table 2), it is observed that MR has the least rate constant which might be due to negligible adsorption. Furthermore, BB is adsorbed to greater extent than CV thereby it showed greater decolourization rates with all four catalysts. This supports the dye sensitised mechanism.

### 3.6 Enhancement of photocatalytic activity of AR grade ZnO

To broaden the photo response of ZnO catalyst for the solar spectrum, various material engineering approaches have been devised. These approaches include doping (with metals, non-metals or metalloids), composite with carbon nano-tubes, formation of hetero-structures with noble metals or other semiconductors, dye sensitisers (Zhang and Zeng, 2010). In this study, we attempted to enhance the photocatalytic activity of commercially available ZnO by loading silver metal on its surface. The ZnO was suspended in an  $AgNO_3$  solution, where it adsorbed  $Ag^+$  ions on its surface (adsorbed quantity 1.9 mg/g ZnO). When the ZnO with adsorbed  $Ag^+$  was treated with an alkaline glucose solution, the  $Ag^+$  was reduced to Ag-metal according to the following chemical reaction (Eq. 7).

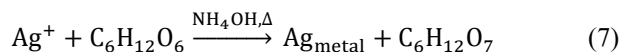

25 The presence of Ag metal on surface was clearly indicated by the appearance of a light-grey colour to the surface sensitised ZnO. The Ag-sensitised ZnO was characterised by powder XRD, which showed extra peaks at  $2\theta=38.1^\circ$ ,  $44.3^\circ$ ,  $64.5^\circ$ , and  $77.9^\circ$  in addition to hexagonal wurtzite peaks of ZnO (Support file, Fig-3). These peaks were characteristic of face-centred

cubic crystallised Ag metal (JCDs data file no. 04-0783) (Ma et al., 2014). Relatively small peak intensities corresponding to Ag metal indicate its smaller crystal size on the surface of ZnO. The presence of Ag metal was also confirmed through DRS in absorbance mode and energy-dispersive X-ray spectroscopy (Support file, Fig-4 and 5).

The process of photocatalysis by Ag/ZnO is depicted in Fig. 6. The coupling of Ag metal with ZnO alters the band structure of the photocatalyst. The CB energy of Ag metal is lower than that of ZnO. Molecules of the dyes that adhered to the ZnO particle surface are excited by the incoming light and release electrons from the LUMO to the CB of ZnO. The ZnO is also excited by UV component of solar irradiation, thus forming electron-hole pairs and the electrons are available in the CB of ZnO. Eventually, these electrons are transported to the CB of the Ag metal. This delocalization of the electrons is thermodynamically favourable and facilitates reduction of the rate of recombination of electron-hole pairs produced during the photo-excitation of ZnO. In turn, more electrons and holes are made available for chemical reactions, which enhance the photocatalytic activity of Ag-loaded ZnO (Kuriakose et al., 2014; Jing et al., 2006). These electrons and holes are responsible for the generation of  $\text{OH}^-$  and  $\text{OH}^\bullet$  free radicals respectively, which are extremely strong oxidants for the decomposition of dyes.

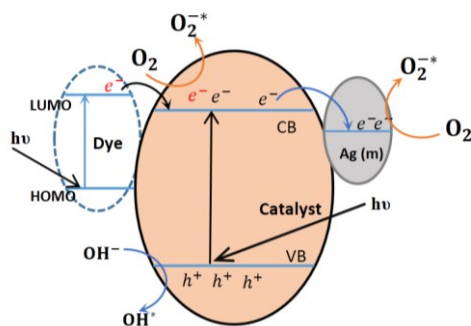

**Figure 6:** Schematic diagram representing the band structure silver metal loaded ZnO, electronic excitation process, dye sensitized mechanism and electron delocalization in silver metal loaded ZnO

The calculated rate constant for decolourization of MR, CV and BB using the Ag-loaded ZnO is 1.22, 1.28 and 1.33 times higher, respectively, than that of pure ZnO. These results indicate that the loading of Ag on ZnO enhances the photocatalytic activity of ZnO in solar irradiation. Ag deposits on ZnO surfaces have been reported to act as electron sinks and hinder the recombination of photo-induced electrons and holes. This ensures that the charge separation on Ag-loaded ZnO is higher than that on ZnO. The charge-transfer process occurring at the Ag-ZnO interface assists the transport of electrons to the surface, which is responsible for enhancing photocatalytic activity (Patil et al., 2015; Zeng et al., 2008). Dinesh et al. (2014) demonstrated that the hybrid ZnO@Ag core-shell nano rods exhibit more effective degradation of rhodamine 6G, Congo red, and amido black B-10 than ZnO nano rods.

### 3.8. COD Removal

In this study, we have estimated COD removal of treated dye solution with AR grade ZnO as it showed higher photocatalytic activity. The results showed that a partial COD removal was occurred at decolourization stages of dyes (46% for CV, 53% for

BB and 38% for MR). To achieve further COD removal, experiment was continued up to 5 h. Analysis of the results indicated that COD removal is not significantly different at 4 and 5 h irradiation time. At the end of 5 h irradiation time, observed COD removal was 92% for CV, 95% for BB and 89% for MR (Support file Table-3).

### 3.7 Cost comparison

- 5 The suitability of a particular photocatalyst during the photocatalytic removal of organic pollutants in the water depends on its activity and cost. ZnO, TiO<sub>2</sub>, and SnO<sub>2</sub> cost Rs. 1100=00, 2800=00, and 8000=00, per kg respectively, while the cost of Degussa P-25 is Rs.120000=00 per kg. A comparison of costs reveals that AR grade ZnO is less expensive hence affordable than are Degussa P-25 or AR grade TiO<sub>2</sub> and SnO<sub>2</sub>. Even after accounting for the cost of starting material and other chemicals, labour, time, special requirements of equipment, and electricity consumed, any laboratory-synthesised form of ZnO, TiO<sub>2</sub>, and SnO<sub>2</sub>
- 10 will remain costlier than the commercially available AR metal oxides. In brief, AR grade ZnO is a cost-effective and efficient material for the photocatalytic degradation of organic dyes under solar irradiation in an aqueous medium.

### 4. Conclusion

- Photocatalysis based on metal oxide semiconductors is an important approach to the utilization of the abundant energy from the sun for dye degradation. Intense research efforts have led to significant progress for the complete mineralization of organic
- 15 pollutants using nanomaterial like ZnO, TiO<sub>2</sub>, SnO<sub>2</sub> etc. under light illumination. In the present study, authors have compared photocatalytic activity of ZnO, TiO<sub>2</sub>, SnO<sub>2</sub> and Degussa P-25 in the degradation of industrial dyes (CV, BB, and MR) under optimized conditions of pH (pH 9), catalyst dose (400 mg L<sup>-1</sup>), depth of dye solution (1.5 cm) and rate of circulation (130 ml min<sup>-1</sup>) and identical conditions of sunlight intensity and dye concentration. A comparison of the photocatalytic activity of ZnO with the benchmark, the Degussa P-25 (TiO<sub>2</sub>), as well as with AR grade TiO<sub>2</sub> and SnO<sub>2</sub> showed that despite low specific
- 20 surface area and relatively large grain size, ZnO displayed higher photocatalytic activity in the degradation of dyes (CV, BB, and MR) under solar irradiation. The photocatalytic activity of AR grade ZnO can be enhanced by coupling it with a noble metal such as Ag. The cost of AR grade ZnO is lower than that of the other photocatalyst used in this study. Therefore, we suggest solar photocatalysis using AR grade ZnO can prove to be cost effective and an energy efficient method.

### 25 References

- Abo, R., Kummer, N., and Merkel B. J.: Optimized photodegradation of Bisphenol A in water using ZnO, TiO<sub>2</sub> and SnO<sub>2</sub> photocatalysts under UV radiation as a decontamination procedure, *Drink. Water Eng. Sci.*, 9, 27–35, 2016.
- Akpan, U. G. and Hameed, B. H.: Parameters affecting the photocatalytic degradation of dyes using TiO<sub>2</sub> based photocatalysts: A review, *Journal of Hazardous Materials*, 170, 520–529, 2009.
- 30 Anand, M., Shim, H-S., Kim, Y. S. and Kim, W. B.: Structural and Optical Properties of Co- and Ti-ZnO Composite Nanofibers Prepared by Using an Electrospinning Method, *J. Korean Phys. Soc.*, 53, 2423 – 2426, 2008.
- Chen, D. and Ray, A. K.: Removal of toxic metal ions from wastewater by semiconductor photocatalysis, *Chemical Engineering Science*, 56, 1561-1570, 2001.

- Cheng, G., Chen, J., Ke, H., Shang, J. and Chu, R.: Synthesis, characterization and photocatalysis of SnO<sub>2</sub>nanorods with large aspect ratios, *Materials Letters*, 65, 3327–3329, 2011.
- Cheng, G., Hao, T., Ke, H., Gong, F., Chen, J., and Shang, J.: Controlled growth of SnO<sub>2</sub> nanostructures with small diameters 5 and their photocatalytic properties, *IET Micro & Nano Lett.*, 8, 473–475, 2013.
- 5 Chong, M. N., Jin, B., Chow, C. W. K. and Saint, C. P.: A new approach to optimize an annular slurry reactor system for the degradation of Congo-red: Statistical analysis and modelling, *Chemical Eng. J.*, 152, 158–166, 2009.
- Chong, M. N., Jin, B., Chow, C. W. K. and Saint, C.: Recent developments in photocatalytic water treatment technology: A review, *Water Research*, 44, 2997-3027, 2010.
- Dinesh, V. P., Biji, P., Ashok, A., Dhara, S. K., Kamruddin, M., Tyagi, A. K. and Raj, B.: Plasmon-mediated, highly enhanced 10 photocatalytic degradation of industrial textile dyes using hybrid ZnO@Ag core–shell nanorods. *RSC Adv.*, 4, 58930-58940, 2014.
- Elsayed, E. M., Shalan, A. E. and Rashad, M. M.: Preparation of ZnO nanoparticles using electrodeposition and co-precipitation techniques for dye-sensitized solar cells applications, *J Mater Sci: Mater Electron*, 25, 3412–3419, 2014.
- Girish Kumar S. and Koteswara Rao K. S. R.: Zinc oxide based photocatalysis: tailoring surface bulk structure and related 15 interfacial charge carrier dynamics for better environmental applications, *RSC Adv.*, 5, 3306-3351, 2015.
- Gupta, S. M. and Tripathi M.: A review of TiO<sub>2</sub> nanoparticles, *Chinese Science Bulletin*, 56, 1639-1657, 2011. doi: 10.1007/s11434-011-4476-1
- Han, J., Liu, Y., Singhal, N., Wang, L. and Gao, W.: Comparative photocatalytic degradation of estrone in water by ZnO and TiO<sub>2</sub> under artificial UV-A and solar irradiation, *Chemical Engineering Journal*, 213, 150–162, 2012.
- 20 Herrmann, J. M.: Heterogeneous photocatalysis: fundamentals and applications to the removal of various types of aqueous pollutants, *Catal. Today*, 53, 115–129, 1999.
- Hou, H. et al. Efficient Photocatalytic Activities of TiO<sub>2</sub> Hollow Fibers with Mixed Phases and Mesoporous Walls. *Sci. Rep.*, 5, 15228, 2015.
- Hu, A., Liang, R., Zhang, X., Kurdi, S., Luong, D., Huang, H., Peng, P., Marzbanrad, E., Oakes, K. D., Zhou, Y. and Servos, 25 M. R.: Enhanced photocatalytic degradation of dyes by TiO<sub>2</sub>nanobelts with hierarchical structures, *J. Photochem. Photobiol., A*, 256, 7– 15, 2013.
- Hussein, F. H. and Abass T. A.: Photocatalytic treatment of textile industrial wastewater, *Int. J. Chem. Sci.*, 8, 1353-1364, 2010.
- Janotti, A. and Van de Walle, C. G.: Fundamentals of zinc oxide as a semiconductor, *Rep. Prog. Phys.*, 72, 126501-126529, 30 2009.
- Jiji, A., Joseph, N., Donald, R. B., Daniel, M., Amit, S., and Qiang, Y.: Size-Dependent Specific Surface Area of Nanoporous Film Assembled by Core-Shell Iron Nanoclusters, *J. Nanomater.*, 2006; 1-4, Article ID 54961, 2006. DOI:10.1155/JNM/2006/54961.

- Jing, L. Q., Qu, Y., Wang, B., Li, S., Jiang, B., Yang, L., Wei, F. and Fu, H.: Review of photoluminescence performance of nan0-sized semiconductor materials and its relationship with photocatalytic activity, *J. Sol. Ener. Mater. Solar Cells*, 5 90, 1773-1787, 2006.
- Jo-Yong, P., Yun-Jo, L., Ki-Won, J., Jin-Ook B. G. and Dae, J. Y.: Chemical Synthesis and Characterization of Highly Oil  
5 Dispersed MgO Nanoparticles, *J. Ind. Eng. Chem.*, 12(6), 882-887, 2006.
- Kansal, S. K., Singh, M. and Sud, D.: Studies on photodegradation of two commercial dyes in aqueous phase using different photocatalysts, *J. Hazard. Mater.*, 141, 581-590, 2007.
- Keane, D. A., McGuigan, K. G., Ibáñez, P. F., Polo-López, M. I., Byrne, J. A., Dunlop, P. S. M., O'Shea, K., Dionysioufg, D.  
10 D., Pillai, S. C.: Solar photocatalysis for water disinfection: materials and reactor design. *Catal. Sci. Technol.*, 4, 1211–1226, **2014**.
- Konstantinou, I. K. and Albanis, T. A.: TiO<sub>2</sub>-assisted photocatalytic degradation of azo dyes in aqueous solution: Kinetic and mechanistic investigations. A review, *Appl. Catal. B.*, 49, 1–14, 2004.
- Kuriakose, S., Choudhary, V., Satpati, B. and Mohapatra, S.: Enhanced photocatalytic activity of Ag–ZnO hybrid plasmonic nanostructures prepared by a facile wet chemical method, *Beilstein J. Nanotechnol.*, 5, 639–650, 2014.  
15 doi:10.3762/bjnano.5.75.
- Lakshmi Prasanna V. and Rajagopalan, V.: A New Synergetic Nanocomposite for Dye Degradation in Dark and Light, *Sci. Rep.*, 6, 38606, 2016. DOI: 10.1038/srep38606
- Li, K., Xiong, J., Chen, T., Yan, L., Dai, Y., Song, D., Lv, Y., Zeng, Z.: (2013) Preparation of graphene/TiO<sub>2</sub> composites by non-ionic surfactant strategy and their simulated sunlight and visible light photocatalytic activity towards representative  
20 aqueous POPs degradation, *J. Hazard. Mater.*, 250–251, 19–28, 2013.
- Li, X. Z., Zhao, W. and Zhao, J. C.: Visible light-sensitized semiconductor photocatalytic degradation of 2, 4-dichlorophenol, *Sci. China, Ser. B*, 45, 421–425, 2002.
- Li, Y., Qin, Z., Guo, H., Yang, H., Zhang, G., Ji, S., and Zeng, T.: Low-Temperature Synthesis of Anatase TiO<sub>2</sub> Nanoparticles with Tunable Surface Charges for Enhancing Photocatalytic Activity, *PLoS ONE*, 9, 114638(1-9), 2014.  
25 DOI:10.1371/journal.pone.0114638
- Lin, C., Lin, K.: Photocatalytic oxidation of toxic organohalides withTiO<sub>2</sub>/UV: The effects of humic substances and organic mixtures, *Chemosphere*, 66, 1872–1877, **2007**.
- Lydakis-Simantiris, N., Riga, D., Katsivela, E., Mantzavinos, D. and Xekoukoulotakis, N. P.: Disinfection of spring water and secondary treated municipal wastewater by TiO<sub>2</sub> photocatalysis, *Desalination*, 250, 351-355, 2010.
- 30 Ma, S., Xue, J., Zhou, Y. and Zhang, Z.: Photochemical synthesis of ZnO/Ag<sub>2</sub>O heterostructures with enhanced ultraviolet and visible photocatalytic activity, *J. Mater. Chem. A*, 2, 7272-7278, 2014.
- Muthirulan, P., Meenakshisundaram, M. and Kannan, N.: Beneficial role of ZnO photocatalyst supported with porous activated carbon for the mineralization of alizarin cyanin green dye in aqueous solution, *J. Adv. Res.*, 4, 479–484, 2013.

- Nagaraja, R., Kottam, N., Girija, C. R. and Nagabhushana, B. M.: Photocatalytic degradation of Rhodamine B dye under UV/solar light using ZnO nanopowder synthesized by solution combustion route, Powder Technol., 215-216, 91–97, 2012.
- Nguyen, C. C., Vu, N. N. and Do, T.: Recent advances in the development of sunlight driven hollow structure photocatalysts and their applications, J. Mater. Chem. A, 3, 18345-18359, 2015.
- 5 Pardeshi, S. K. and Patil, A. B.: A simple route for photocatalytic degradation of phenol in aqueous zinc oxide suspension using solar energy, Sol. Energy, 82, 700–705, 2008.
- Parida, K.M., Parija, S.: Photocatalytic degradation of phenol under solar radiation using microwave irradiated zinc oxide, Sol. 10 Energy, 80, 1048–1054, 2006.
- 10 Patil, A. B., Patil, K. R. and Pardeshi, S. K.: Ecofriendly synthesis and solar photocatalytic activity of S-doped ZnO, J. Hazard. Mater., 183, (2010) 315–323, 2010.
- Patil, S. S., Mali, M. G., Tamboli, M. S., Patil, D. R., Kulkarni, M. V., Yoon, H., Kim, H., Al-Deyab, S. S., Yoon, S. S., Kolekar, S. S. and Kale, B. B.: Green approach for hierarchical nanostructured Ag-ZnO and their photocatalytic 15 performance under sunlight, Catal. Today, 2015.
- 15 Pawar, R. A., Shinde, D. R. and Tambade, P. S.: Synthesis of ZnO photocatalyst via ZnO<sub>2</sub> precursor and its application for dye degradation from effluent under solar irradiation, Desalination Water Treat., 57, 16514–16521, 2016.
- Qamar, M. and Muneer, M.: A comparative activity of titanium oxide and zinc oxide by investigating the degradation of vanillin, Desalination, 249, 535-540, 2009.
- Qi, L., Yu, J., Liu, G., Wong, P. K.: Synthesis and photocatalytic activity of plasmonic Ag@AgCl composite immobilized on 20 titanate nanowire films, Catal. Today, 224, 193–199, 2014.
- Sakthivel, S., Neppolian, B., Shankar, B.V., Arabindoo, B., Palanichamy, M. and Murugesan, V.: Solar photocatalytic degradation of azo dye: comparison of photocatalytic efficiency of ZnO and TiO<sub>2</sub>, Sol. Ener. Mater. Sol. Cells, 77, 68, 2003.
- Shinde, D. R., Qureshi, I., Pawar, R. A., Pawar, R. R.: Enhancement of photocatalytic activity of ZnO via Nd(III) doping 25 towards the degradation of dyes under solar irradiation, J. Nanoeng. and Nanomanufact., 5, 197–203, 2015.
- Singh, N. K., Saha, S., Pal, A.: Solar light-induced photocatalytic degradation of methyl red in an aqueous suspension of commercial ZnO: a green approach, Desalination Water Treat., 53, 501–514, 2015.
- Sood, S., Mehta, S. K., Umar, A. and Kansal S. K.: The visible light-driven photocatalytic degradation of Alizarin red S using 30 Bi-doped TiO<sub>2</sub> nanoparticles, New J. Chem., 38, 3127-3136, 2014.
- 30 Wang, C., Zhang, Y., Zhu, T., Wang, P., and Gao, S.: Photocatalytic degradation of methylene blue and methyl orange in a Zn(II)-based Metal–Organic Framework, Desalination Water Treat., 57, 17844-17851, 2016.
- Xu, L., Wei, B., Liu, W., Zhang, H., Su, C. and Che, J.: Flower-like ZnO-Ag<sub>2</sub>O composites: precipitation synthesis and photocatalytic activity, Nano. Res. Lett., 8, 536–541, 2013.

- Yang, S., Tian, H., Xiao, H., Shang, X., Gong, X., Yao, S., Chen, K.: Photodegradation of cyanine and merocyanine dyes, *Dyes and Pigments*, 49, 93–101, 2001.
- Zhang, D. and Zeng, F.: Synthesis of an Ag–ZnO nanocomposite catalyst for visible light-assisted degradation of a textile dye 5 in aqueous solution, *Res. Chem. Intermed.* 36, 1055–1063, 2010.
- 5 Zhang, Y., Wu, L., Xie, E., Duan, H., Han, W. and Zhao, J.: A simple method to prepare uniform-size nanoparticle TiO<sub>2</sub> electrodes for dye-sensitized solar cells, *J. Power Sources*, 189, 1256–1263, 2009.
- Zheng, Y. H., Chen, C. Q., Zhan, Y. Y., Lin, X. Y., Zheng, Q., Wei, K. M. and Zhu, J. F.: Photocatalytic activity of Ag/ZnO heterostructure nano-catalyst: Correlation between structure and property. *J. Phys. Chem. C*, 2008, 112: 10 10773–10777.
- 10 Zhi-gang, J., Kuan-kuan, P., Yan-hua, L. and Rong-sun, Z.: Preparation and photocatalytic performance of porous ZnO microrods loaded with Ag, *Trans. Nonferrous Met. Soc. China*, 22, 873–878, 2012.
- Zhou, W., Du, G., Hu, P., Li, G., Wang, D., Liu, H., Wang, J., Boughton, R., Liu, D. and Jiang, H.: Nanoheterostructures on TiO<sub>2</sub> nanobelts achieved by acid hydrothermal method with enhanced photocatalytic and gas sensitive performance, *J. 15 Mater. Chem.*, 21, 7937–7945, 2011.
- Zhou, X. T., Ji H. B. and Huang X. J.: Photocatalytic degradation of methyl orange over metalloporphyrins supported on TiO<sub>2</sub> degussa P25, *Molecules*, 17, 1149–1158, 2012.
