# Supplementary material for: Photocatalytic degradation of Dyes in Water by Analytical Reagent Grade Photocatalysts – A comparative study
Source: Copernicus journal article supplement (doi:10.5194/dwes-2017-20), 2017-06-02
Supplement: Supplementary file [file Support_filenew.pdf › dwespdffiles/Support_filenew.pdf]

## Support file

### Photocatalytic degradation of dyes in water by analytical reagent grade ZnO, TiO<sub>2</sub> and SnO<sub>2</sub>: A comparative study

Dnyaneshwar R. Shinde, Popat S. Tambade\*, Manohar G. Chaskar, Kisan M. Gadave

Prof. Ramkrishna More Arts, Commerce and Science College, Akurdi, Pune-44,

Affiliated Savitribai Phule Pune University (India)

Correspondence: Popat S. Tambade (pstam3@rediffmail.com)

**Table-1: Characteristic of Degussa P25 (TiO<sub>2</sub>) photocatalyst (As per manufacturers information)**

| Material                                                                           | Degussa TiO <sub>2</sub> p25 Nanoparticles                                          |
|------------------------------------------------------------------------------------|-------------------------------------------------------------------------------------|
| SEM of Degussa P-25 photocatalyst                                                  |                                                                                     |
| 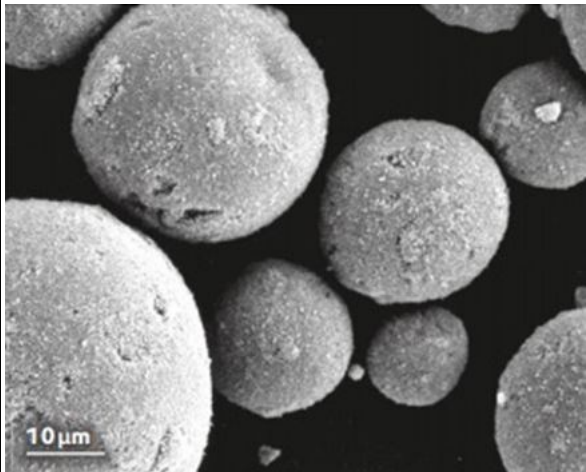 |  |
| APS                                                                                | 25nm                                                                                |
| Rutile                                                                             | 20 %                                                                                |
| Anatase                                                                            | 80 %                                                                                |
| Moisture                                                                           | <1.5 Wt%                                                                            |
| Loss of weight in drying                                                           | < 2.0 %                                                                             |
| Loss of weight in burning                                                          | < 1.0 %                                                                             |
| <b>Assay</b>                                                                       | <b>99.9%</b>                                                                        |
| Al                                                                                 | < 17ppm                                                                             |
| Mg                                                                                 | < 65ppm                                                                             |
| Si                                                                                 | <120ppm                                                                             |
| Fe                                                                                 | 9.75                                                                                |
| Ca                                                                                 | <75ppm                                                                              |
| S                                                                                  | < 130ppm                                                                            |
| Nb                                                                                 | < 80 ppm                                                                            |

**Table-2:** Structural information of dyes

| Sr. No. | Name of the Dye      | Structure and mol. formula                                                                                                                                | $\lambda_{\text{max}}$ at specific pH of dye soln. | Mol. Wt. |
|---------|----------------------|-----------------------------------------------------------------------------------------------------------------------------------------------------------|----------------------------------------------------|----------|
| 1       | Basic Blue - 41 (BB) | 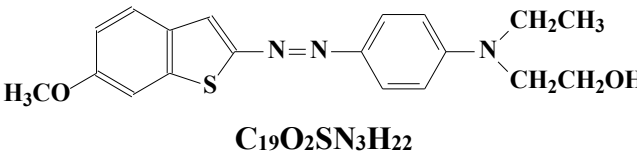<br>$\text{C}_{19}\text{O}_2\text{SN}_3\text{H}_{22}$                   | 605.2 nm pH=7                                      | 482.7 g  |
| 2       | Methyl Red (MR)      | <br>$\text{C}_{15}\text{O}_2\text{N}_3\text{H}_{15}$                    | 517.6 nm<br>pH = 4                                 | 269.31 g |
| 3       | Crystal Violet (CV)  | <br>$\text{C}_{25}\text{H}_{30}\text{ClN}_3 \cdot 9\text{H}_2\text{O}$ | 592.4 nm<br>pH=7                                   | 570.12 g |

**Table-3:** COD of the dyes at the time of decolourization on ZnO photocatalyst and at 4 hr. of irradiation time

| Dye            | Initial COD (ppm) | % removal COD               |                      |                      |
|----------------|-------------------|-----------------------------|----------------------|----------------------|
|                |                   | at the time decolourization | 4 h irradiation time | 5 h irradiation time |
| Crystal Violet | 76.8±3.2          | 46.3±4.8                    | 91.6±2.1             | 92.2±2.9             |
| Basic Blue     | 63.85±4.7         | 52.9±5.6                    | 94.9±1.9             | 95.6±2.6             |
| Methyl orange  | 81.98±5.2         | 38.1±3.8                    | 87.2±3.5             | 89.3±3.7             |

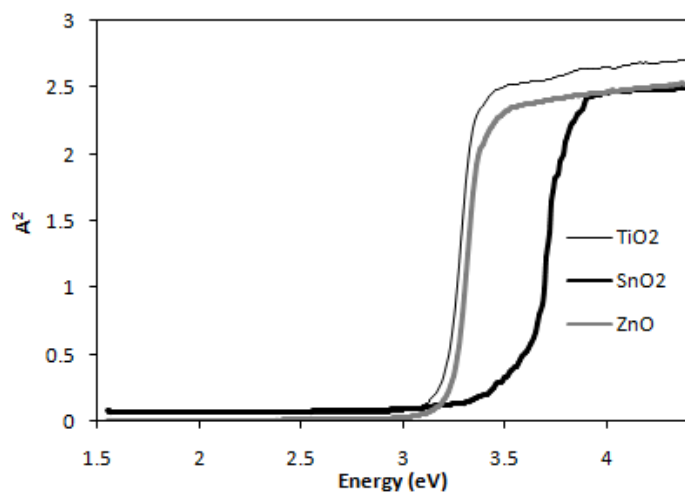

**Fig-1:** Graph  $A^2$  against energy constructed from UV-DRS in absorbance mode to evaluate band gap

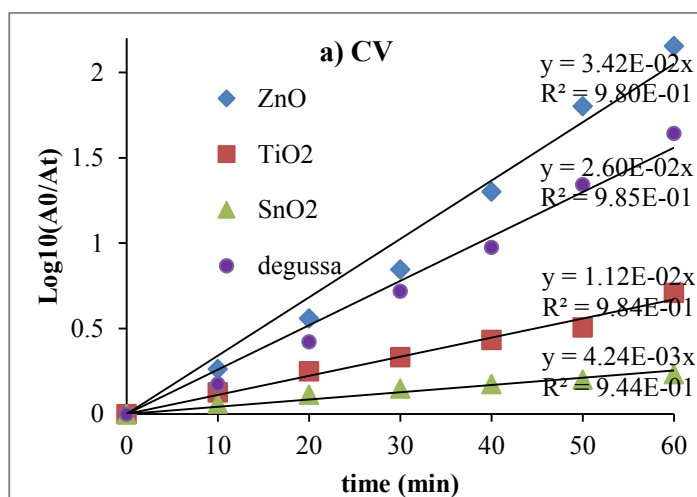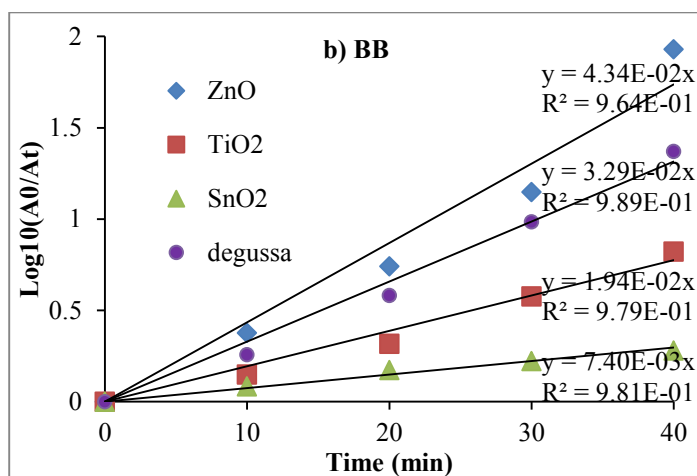

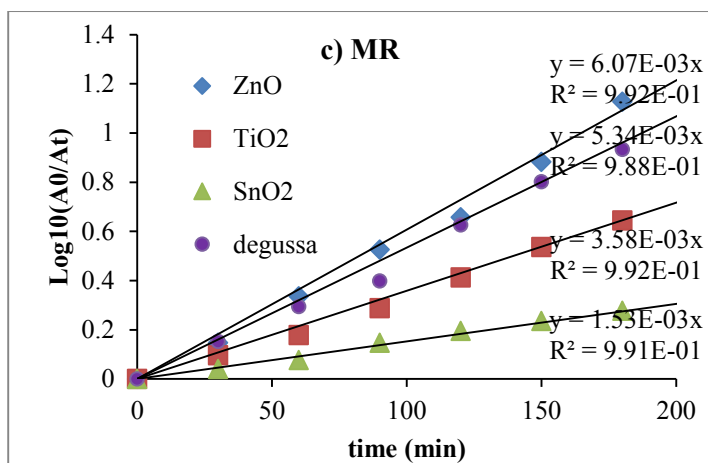

**Figure-2:** Graph of  $\log_{10}(A_0/A_t)$  against time for the evaluation of rate constants of decolourization of dyes on photocatalysts

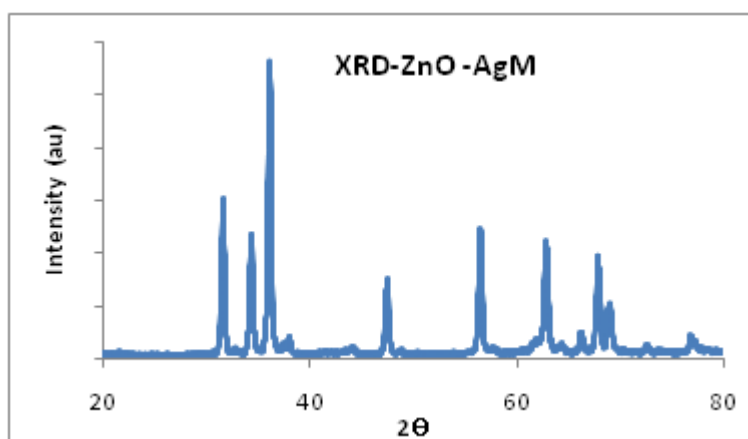

**Figure-3:** XRD of Silver metal sensitized ZnO

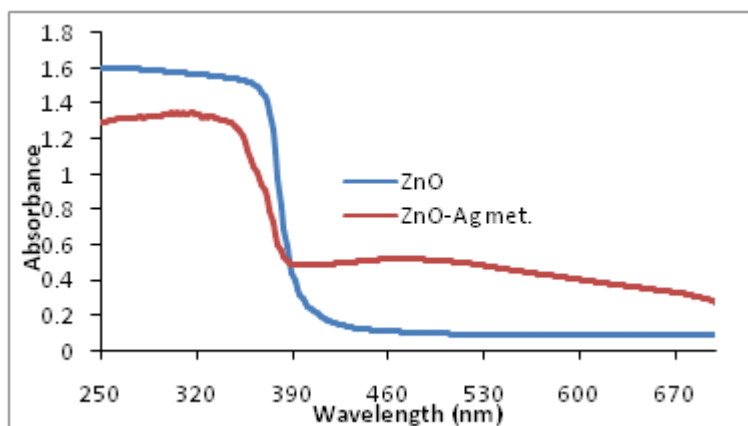

**Figure-4:** UV-DRS in absorbance mode of ZnO and Silver metal sensitized ZnO

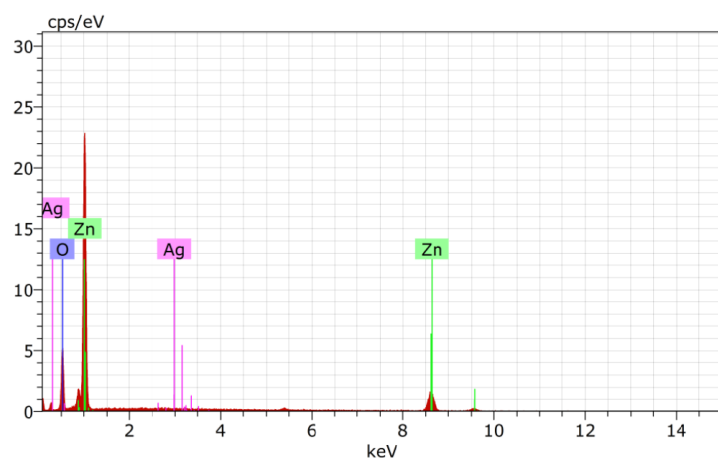

**Figure-5:** EDS Silver metal sensitized ZnO
